# Supplementary material for: Value addition of MXenes as photo-/electrocatalysts in water splitting for sustainable hydrogen production
Source: Royal Society of Chemistry journal article supplement (doi:10.1039/d4cc01811g), 2024-01-01
Supplement: d4cc01811g1.pdf [file d4cc01811g1.pdf]

## Supplementary Information (SI)

### MXene's value addition role as photo/ electrocatalysts in water splitting for sustainable hydrogen production

Sudeshana Pandey<sup>a</sup>, Yongsuk Oh<sup>a</sup>, Mukesh Ghimire<sup>a</sup>, Ji-Won Son<sup>a, b</sup>, Minoh Lee<sup>a\*</sup> and Yongseok Jun<sup>a, b\*</sup>

\*corresponding authors

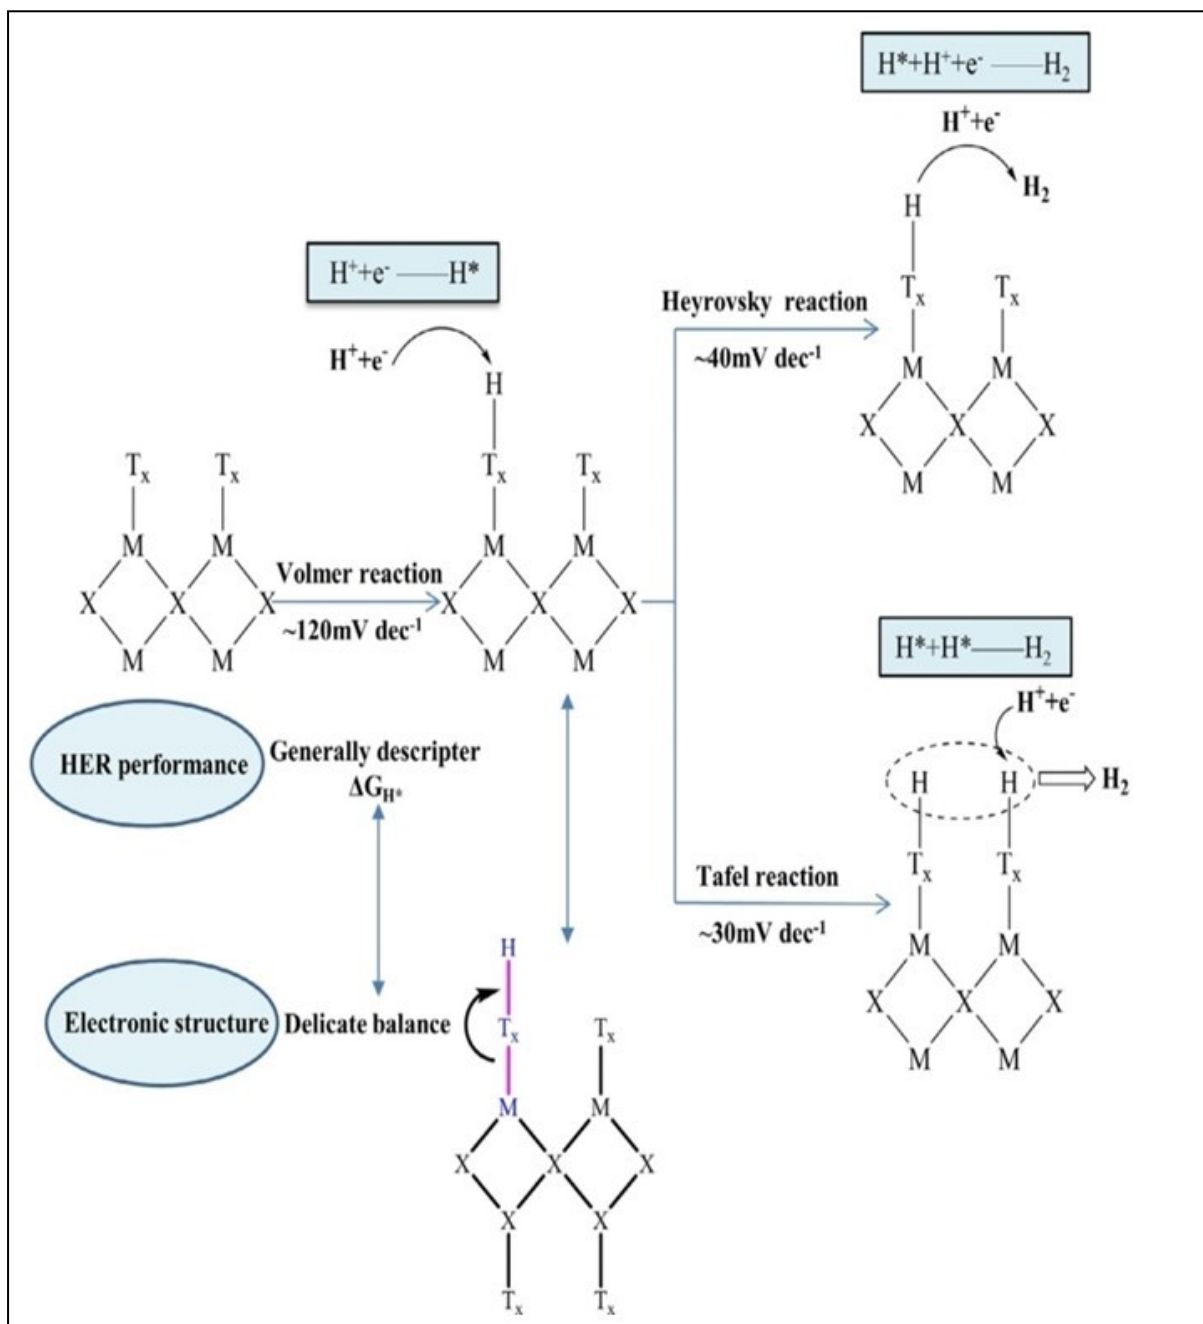

Figure S-1. Mechanisms governing the utilization of MXene materials for HER<sup>26</sup>
